# Supplementary material for: Construction of a prediction model for adverse perinatal outcomes in fetal growth restriction based on a machine learning algorithm
Source: Research Square preprint supplement (doi:10.21203/rs.3.rs-5698332/v1), 2025-04-16
Supplement: Supplementary file 1 [file a572c65dd65c84e48ab7f208.docx]

**Supplementary Materials**

**Machine learning**

**1. eXtreme Gradient Boosting, XGBoost**

XGBoost popularized by Chen and Guestrin in 2016 (1), with Gradient boosting decision tree as the original model. XGBoost and Gradient boosting decision tree followed the same principle, and each new tree is created to reduce the residual of the previous model by the gradient boosting. Residual is designated by the differences between the actual and predicted values. Until the number of decision trees specify threshold, the model has been trained. Additionally, XGBoost optimizes the objective of function, size of the tree, and magnitude of the weights, which are controlled by standard regularization parameters. The better performing model has contributed by the hyperparameters. In which, gamma γ ∈ (0, +∞) denotes minimum loss reduction, which requires to make a split for making the partition on a leaf node of the tree. Minimum child weight wmc ∈ (0, +∞) defines as minimum sum of instance weight, which means if the tree partition step results in a leaf node with the sum of instance weight less than wmc, then the tree will discard further partition. Early stop algorithm works for finding the optimal epoch number referring to given other hyperparameters. Finally, XGBoost also offered subsampling techniques and rc ∈ (0, 1) column subsample ratio constructs in each tree. In the final step, grid search is used to regulate the hyperparameters in order to minimize the classification error.We set up the model through the “xgboost” R packages with the “xgboost” function and set the parameter “max_depth” as 2, “eta” as 1, “nthread” as 2, “nrounds” as 2.

**2. Random forest, RF**

Random forest (2)is a bagging ensemble learning of tree model with a random vector to generate a bootstrap sample and take samples as training set of each decision tree. Then combine these tree models together and vote for a more popular model. The tree T in the forest consists of a root node, several internal nodes, several leaf nodes and edges connecting between these nodes. As a supervised learning method, the label of each sample is known and the aim of the method is to maximum the performance of the classification. To this aim, each node has to make a binary decision with such split function:

In which is the split parameter. According to the node in the dataset, the split parameter and each node have two options, including 0 and 1. We set up the model through the “randomForest” R packages with the “randomForest” function and set the “mtry” parameter as 4.

**3. Support Vector Machine, SVM**

The aim of the SVM (3) is to build a bounder between different labels with the feather vectors from the training dataand. In which xi is the representation of the feather vector, is the label (-1 equals to negative,+1 equals to positive).The bounder is also called optimal hyper plane and can be defined asin which w is the weight vector, x is the feather vector of the training data and b is the bias.

Defined w and b with the following equation and find the maximum margin.

if yi=1

if yi=-1

There are several methods to improve the prediction ability of the SVM model. For example, change the kernel, tuning the parameters like the cost, gamma and so on. Our models are all based on Gaussian Radial Basis Function (RBF) kernel and set them with the “svm” statement in R package e1071 for SVM model with cost-sensitive calibration and “ksvm” statement in kernlab package for SVM model with SMOTE and imbalanced data.

**4. Neural Network, Nnet**

Back Propagation Artificial Neural Network (4) is a type of back propagation algorithms which is processed as a network composed with biological neural. While a training data is inputted into model under the direction “input layer—hidden layer—output layer”, the network will be adjusting the weights and thresholds among neurons based on external information. The network we built with R package “nnet” has only one hidden layer in addition to input and output layer and set the parameter size=10, decay=0.01, maxit=400.

**5. Logistic regression, LR**

Logistic regression (LR) (5) is mainly applicable to the problem of binary classification. It has been widely used for disease diagnosis and recognition in the medical field due to its advantages of strong interpretation, short running time, easy expansion and convenient implementation. LR takes the Sigmoid function as the prediction function of algorithm. Firstly, the variable X is taken as the input, and the variable Y is the output through the linear function Y= aX +b, and then the Y is converted into the prediction result in the form of tag through the Sigmoid function. The threshold of the prediction function of the model is set before operation, and when the output value obtained by the Sigmoid function is greater than the pre-set threshold, the model will determine the category of the sample as "1"; otherwise, the category of the sample is judged to be "0". Of course, this function threshold is a freely adjustable parameter, which can be chosen in relation to the actual problem and its purpose. In order to prevent the model from overfitting, a regularization penalty term can be added to cost function of LR to obtain a classification prediction model with a suitable degree of fitting, and the commonly used regularization penalty methods can be divided into L1 regularization and L2 regularization.This paper adopted "glm" function in R to build the model of LR.

**6. Stacking algorithm**

Stacking (6) is also known as Stacked Generalization which combines the prediction of base-level models by a meta-level model, it uses the meta-layer learning algorithm to integrate the output of the primary learning algorithm, which effectively avoids over-fitting of the model caused by the limited sample size. The decisions made by the base-level models are grouped up as a new database and a meta-level model will take the database as a training data for the final model setting. According to ZhiHua Zhou (2009) (7), we’d like to select the best three single devices from above with the results in Table S2 and Table S3. The Stacking model takes SVM, RF and LR as the base-level learners while combine the results of them together and form a new dataset. Finally take LR model as meta-level learner based on the new dataset above. We applied the “caretList” statement in R package “caret” to set the base-level classifiers. We set the parameter “methodList” as “c (“glm”, “rf”, “svmRadial”)” which stands for the SVM, RF and LR are the base-level learners. And “caretStack” statement in R package “caretEnsemble” is used to defined the meta-level learner by setting the parameter “method” as “glm”.

**References**

1. Chen T, Guestrin C. XGBoost: A Scalable Tree Boosting System. Proceedings of the 22nd ACM SIGKDD International Conference on Knowledge Discovery and Data Mining. 2016.

2. Breiman L. Random forests, machine learning 45. Journal of Clinical Microbiology. 2001;2:199-228.

3. Noble WS. What is a support vector machine? Nature Biotechnology. 2006;24(12):1565-7.

4. Jesus OD, Hagan MT. Backpropagation Algorithms for a Broad Class of Dynamic Networks. IEEE Transactions on Neural Networks. 2007;18(1):14-27.

5. Goldstein BA, Navar AM, Carter RE. Moving beyond regression techniques in cardiovascular risk prediction: applying machine learning to address analytic challenges. Eur Heart J. 2017;38(23):1805-14.

6. Shunmugapriya P, Kanmani S. Optimization of stacking ensemble configurations through Artificial Bee Colony algorithm. Swarm & Evolutionary Computation. 2013;12(12):24-32.

7. Zhou ZH. Ensemble Learning: Springer US; 2009. 125-42p.

Table S1. Importance and coefficients of variables in random forest, LASSO regression and logistic regression

| Variables | RF importance | LASSO coefficients | LR Pr>|z| |
| --- | --- | --- | --- |
| Abnormal UA doppler | 45.40 | 0.02 | 2.85E-21 |
| AC growth velocity | 0 | 0 | 1.59E-08 |
| AC Z score | 25.87 | 0 | 0.069 |
| Gestational age at diagnosis of FGR | 28.39 | -0.14 | 7.9E-12 |
| EFW growth velocity | 3.67 | 0.01 | 0.000 |
| EFW Z score | 37.01 | 0.01 | 1.90E-11 |
| Age | 0 | 0 | 7.35E-06 |
| Hypertensive disorder of pregnancy | 29.45 | 0 | 3.32E-14 |
| Height | 0 | 0 | 0.590 |
| Pre-pregnancy Weight | 0 | 0 | 0.060 |
| Pre-pregnancy body mass index | 0 | 0.37 | 3.13E-05 |
| Nulliparity | 0 | 0 | 0.023 |
| Pregestational diabetes | 0 | 0 | 0.296 |
| Hypothyroid | 0 | 0 | 0.316 |
| Anemia | 0 | 0 | 0.383 |
| Antiphospholipid syndrome | 0 | 0 | 0.157 |

RF, random forest, LASSO, least absolute shrinkage and selection operator, LR, logistic regression, EFW, estimated fetal weight.

Table S2. Summary of model performance for training set.

| Training set | AUROC | Sensitivity | F1 | PPV | NPV | Balanced Accuracy | Brier |
| --- | --- | --- | --- | --- | --- | --- | --- |
| Stacking | 0.970 | 1.000 | 0.923 | 0.857 | 1.000 | 0.960 | 0.025 |
| LR | 0.906 | 0.851 | 0.868 | 0.886 | 0.948 | 0.932 | 0.205 |
| P vale | <0.001 | <0.001 | <0.001 | <0.001 | <0.001 | <0.001 | <0.001 |
| SVM | 0.909 | 0.857 | 0.872 | 0.889 | 0.950 | 0.934 | 0.197 |
| P vale | <0.001 | <0.001 | <0.001 | 0.005 | <0.001 | <0.001 | <0.001 |
| RF | 1.000 | 1.000 | 1.000 | 1.000 | 1.000 | 1.000 | 0.229 |
| P vale | <0.001 | 0.322 | <0.001 | <0.001 | 0.322 | <0.001 | <0.001 |
| NNET | 0.855 | 0.739 | 0.812 | 0.902 | 0.912 | 0.910 | 0.194 |
| P vale | <0.001 | <0.001 | <0.001 | <0.001 | <0.001 | <0.001 | <0.001 |
| XGboost | 0.834 | 0.929 | 0.705 | 0.571 | 0.967 | 0.794 | 0.105 |
| P vale | <0.001 | <0.001 | <0.001 | <0.001 | <0.001 | <0.001 | <0.001 |

*p* value, comparison diagnostic performance with Stacking model

AUROC, the area under the receiver operating characteristic curve; PPV, positive predictive value; NPV, negative predictive value; RF, random forest; SVM, Support Vector Machine; Nnet, Neural network;

Table S3. Summary of model performance for test set.

| Testing set | AUROC | Sensitivity | F1 | PPV | NPV | Balanced Accuracy | Brier |
| --- | --- | --- | --- | --- | --- | --- | --- |
| Stacking | 0.861 | 0.884 | 0.754 | 0.658 | 0.954 | 0.850 | 0.111 |
| LR | 0.827 | 0.730 | 0.748 | 0.778 | 0.908 | 0.873 | 0.204 |
| P value | <0.001 | <0.001 | 0.577 | <0.001 | <0.001 | <0.001 | <0.001 |
| SVM | 0.816 | 0.712 | 0.733 | 0.765 | 0.901 | 0.870 | 0.204 |
| P value | <0.001 | <0.001 | 0.034 | <0.001 | <0.001 | 0.001 | <0.001 |
| RF | 0.819 | 0.704 | 0.742 | 0.795 | 0.889 | 0.872 | 0.228 |
| P value | <0.001 | <0.001 | 0.222 | <0.001 | <0.001 | <0.001 | <0.001 |
| NNET | 0.804 | 0.663 | 0.727 | 0.814 | 0.890 | 0.874 | 0.197 |
| P value | <0.001 | <0.001 | 0.011 | <0.001 | <0.001 | <0.001 | <0.001 |
| XGboost | 0.832 | 0.928 | 0.695 | 0.558 | 0.967 | 0.787 | 0.122 |
| P value | <0.001 | <0.001 | <0.001 | <0.001 | 0.004 | <0.001 | 0.009 |

*p* value, comparison diagnostic performance with Stacking model

AUROC, the area under the receiver operating characteristic curve; PPV, positive predictive value; NPV, negative predictive value; RF, random forest; SVM, Support Vector Machine; Nnet, Neural network.
